# Supplementary material for: Effect of SO2 on NH3 oxidation over a Cu-SAPO-34 SCR catalyst
Source: Royal Society of Chemistry journal article supplement (doi:10.1039/c5cy02212f), 2016-01-01
Supplement: c5cy02212f1.pdf [file c5cy02212f1.pdf]

Supporting information

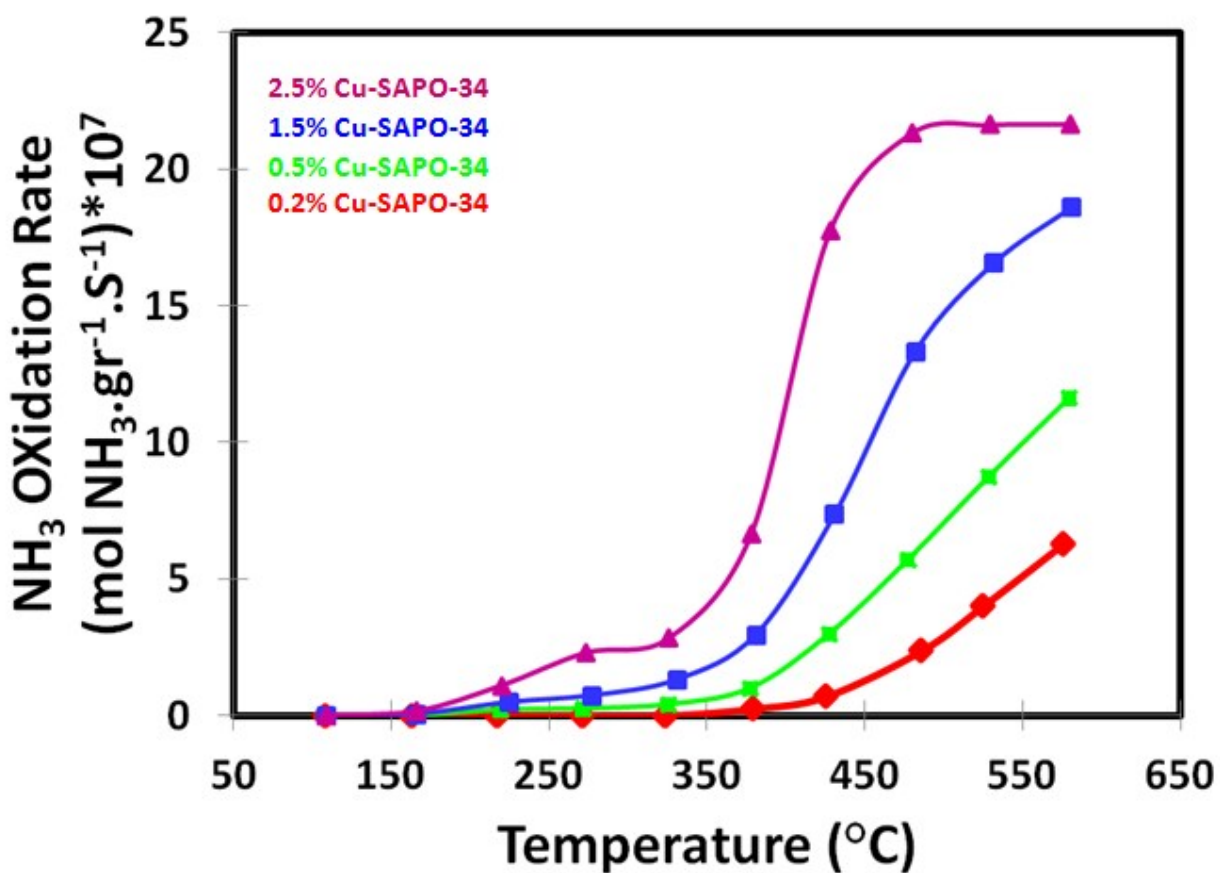

Figure S1. NH<sub>3</sub> oxidation rate in the absence of SO<sub>2</sub> as a function of temperature on Cu-SAPO-34 samples with different Cu loadings. Experiment conditions: 400 ppm NH<sub>3</sub>, 10% O<sub>2</sub> balanced with N<sub>2</sub> at a GHSV of 50,000 h<sup>-1</sup>.

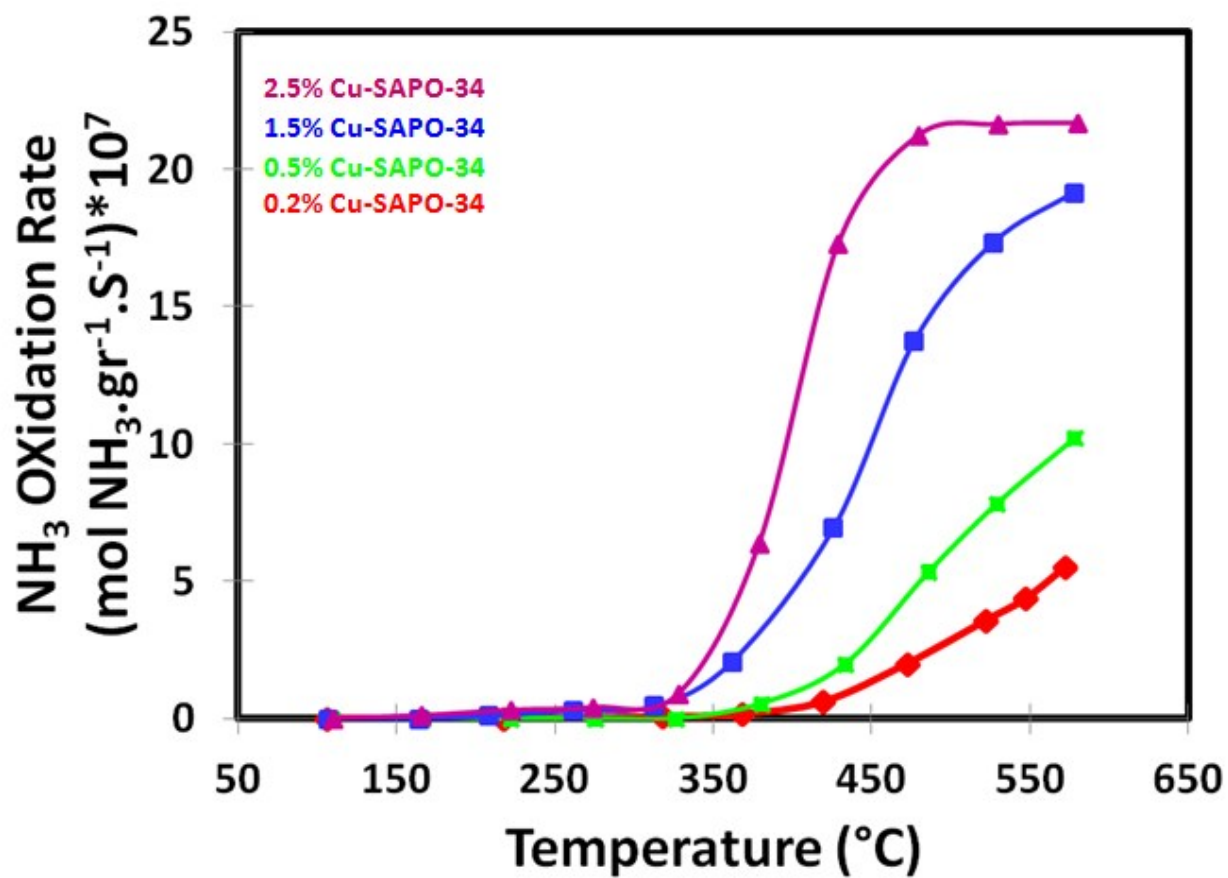

Figure S2. NH<sub>3</sub> oxidation rate in the presence of 50ppm SO<sub>2</sub> as a function of temperature on Cu-SAPO-34 samples with different Cu loadings. Experiment conditions: 50 ppm SO<sub>2</sub>, 400 ppm NH<sub>3</sub>, 10% O<sub>2</sub> balanced with N<sub>2</sub> at a GHSV of 50,000 h<sup>-1</sup>.

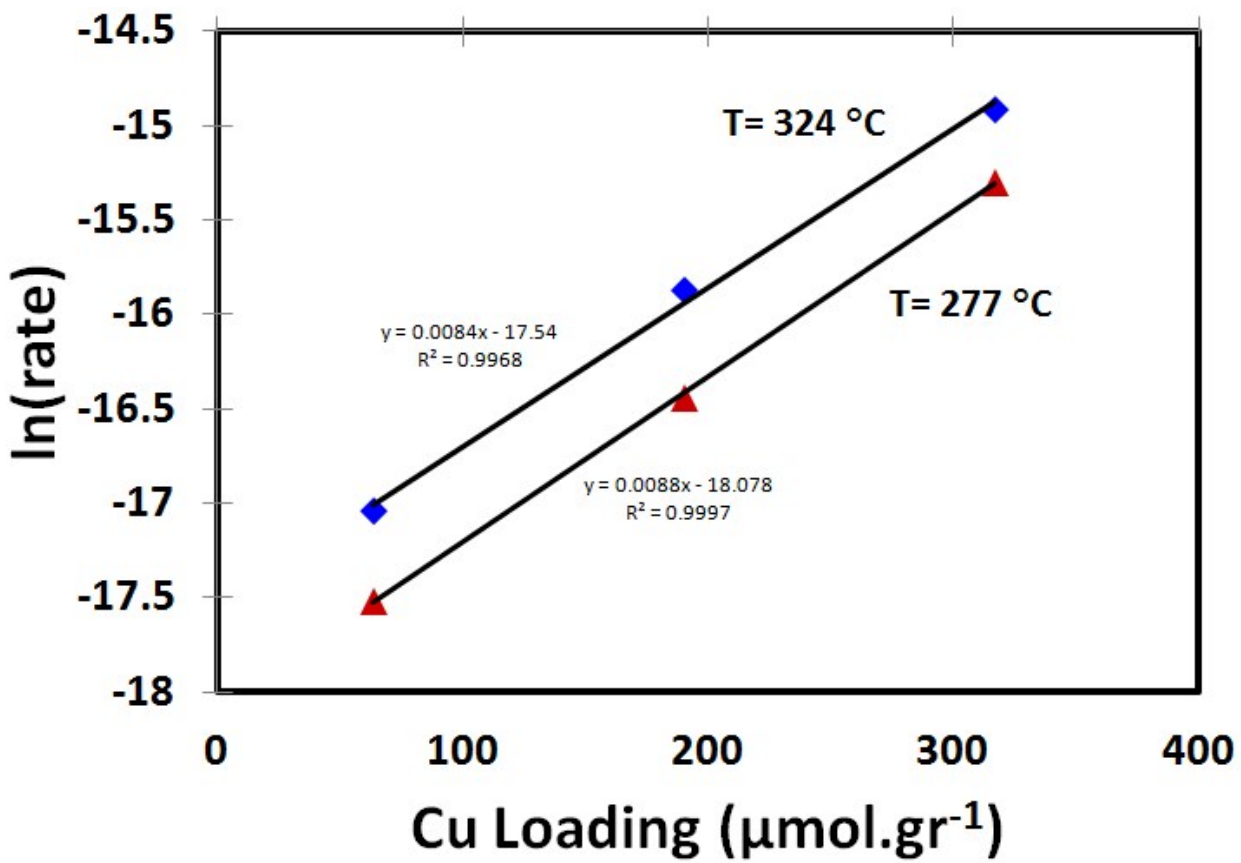

Figure S3.  $\text{NH}_3$  oxidation rates in the absence of  $\text{SO}_2$  as function of Cu loading at 277 and 324°C. Experiment conditions: 400 ppm  $\text{NH}_3$ , 10%  $\text{O}_2$  balanced with  $\text{N}_2$  at a GHSV of 50,000  $\text{h}^{-1}$ .
